# Supplementary material for: Rapid detection of an anthrax biomarker based on the recovered fluorescence of carbon dot–Cu(ii) systems
Source: Royal Society of Chemistry journal article supplement (doi:10.1039/c7tc01058c), 2017-01-01
Supplement: c7tc01058c1.pdf [file c7tc01058c1.pdf]

## Supporting Information

### Rapid detection of an anthrax biomarker based on the recovered fluorescence of carbon dots-Cu(II) system

Pingjing Li<sup>1,2</sup>, Ann Nee Ang<sup>1</sup>, Huatao Feng<sup>1</sup>, Sam F.Y. Li<sup>1,2\*</sup>

1. Chemistry department, National University of Singapore, 3 Science Drive 3, S117543

2. NUS Environmental Research Institute, National University of Singapore, T-Lab Building, 5A Engineering Drive 1, Singapore 117411

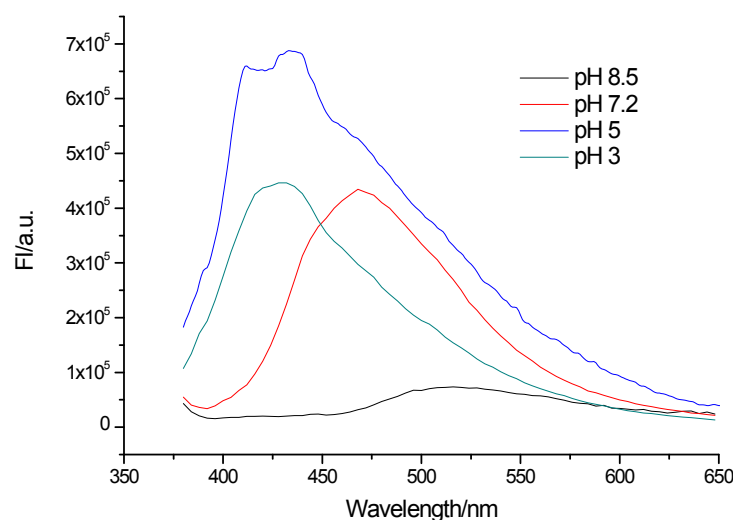

**Fig. S1** Emission spectra under 365nm excitation of CDs prepared at different pH.

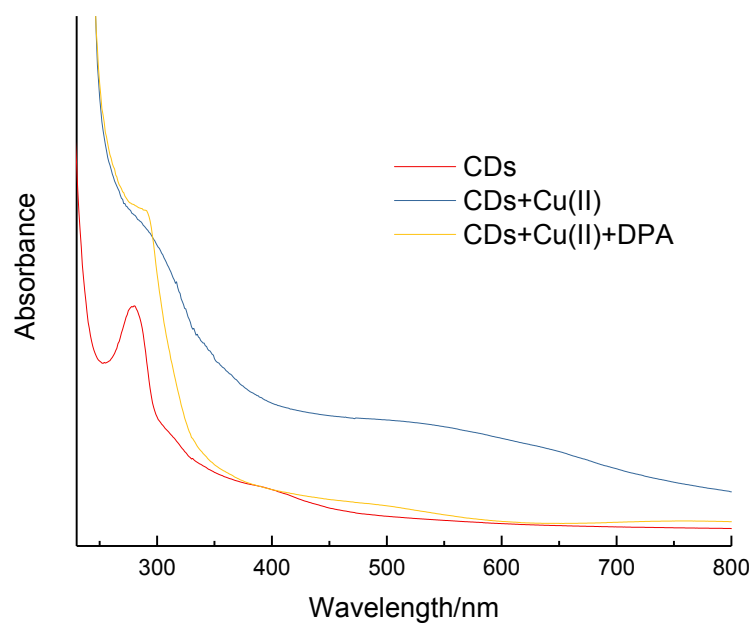

**Fig. S2** UV/Vis absorption (Abs) spectra in the absence and presence of Cu(II).

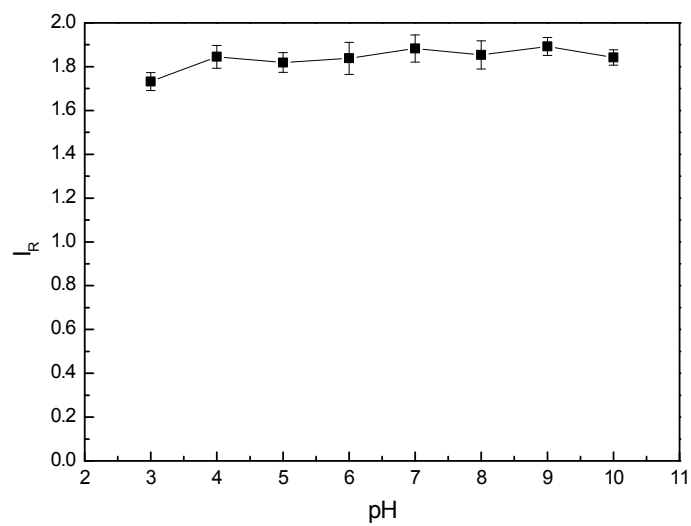

**Fig. S3** pH effect on the fluorescence of CDs.  $I_R$  is the fluorescent ratio of  $I_{420}/I_{352}$ .

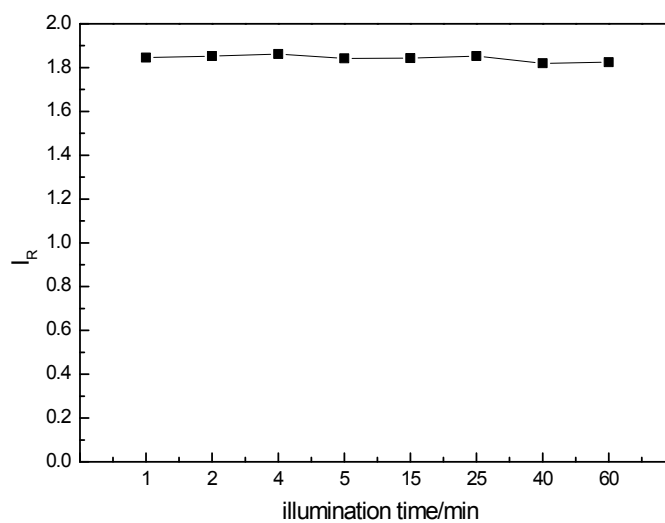

**Fig. S4** Photostability of CDs illustrated with time-course study of fluorescence ratio of CDs at two different fluorescence wavelengths by illumination with a UV lamp (365nm).  $I_R$  is the fluorescence ratio of  $I_{420}/I_{352}$ .

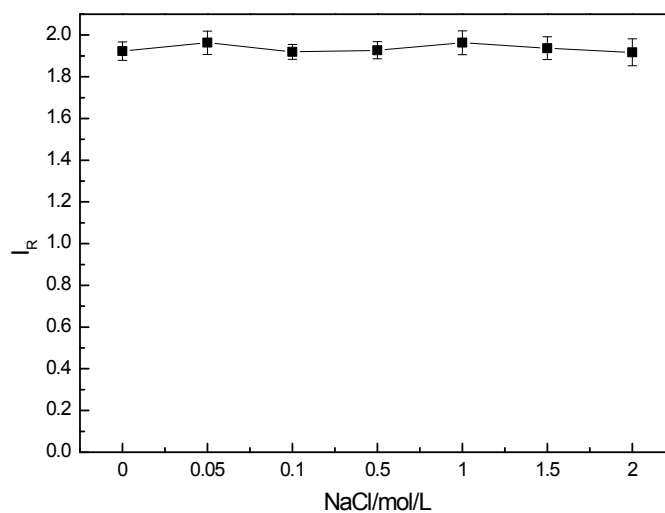

**Fig. S5** Effect of salt on fluorescence of CDs.  $I_R$  is fluorescence ratio of  $I_{420}/I_{352}$ .

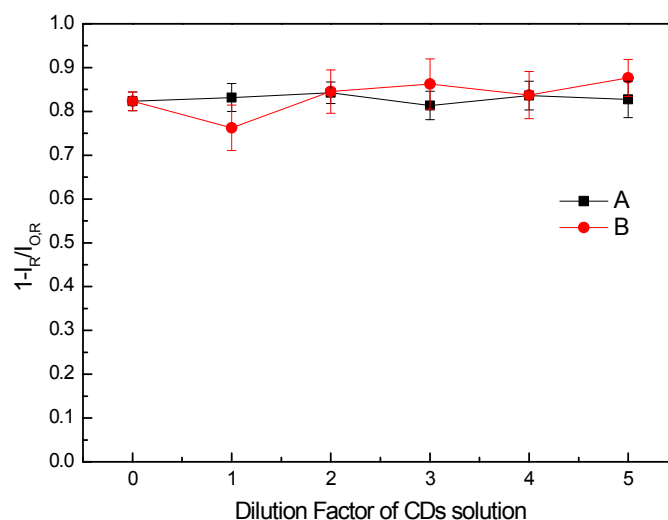

**Fig. S6** Changes of (A) fluorescence intensity ratio of  $I_{420}/I_{352}$  and (B) fluorescence intensity of  $I_{420}$  only on CDs with different dilution factors in a given Cu(II) concentration of 1000  $\mu\text{g/L}$ .

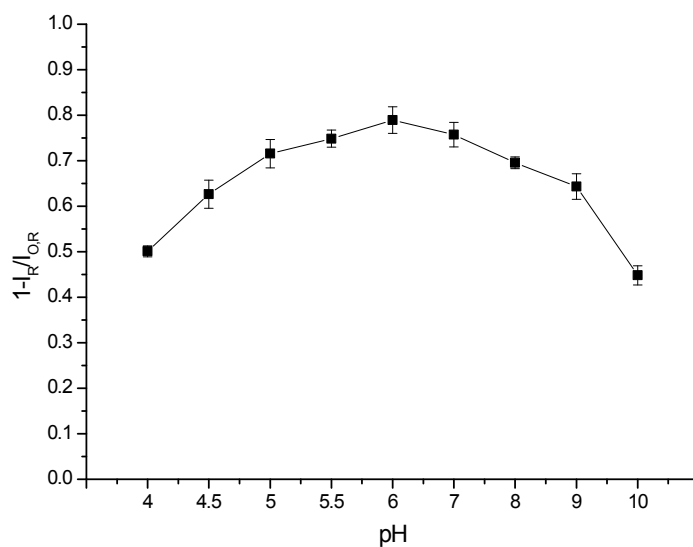

**Fig. S7.** pH effect of CDs-Cu(II) quenching system. Conditions: CDs concentration, 90 $\mu\text{g/mL}$ ; Cu(II) concentration: 500  $\mu\text{g/L}$ ; incubation time: 5 min; fluorescence intensity ratio of CDs,  $I_0$  and  $I$  are ratio fluorescence intensity in the absence and presence of Cu(II), respectively.

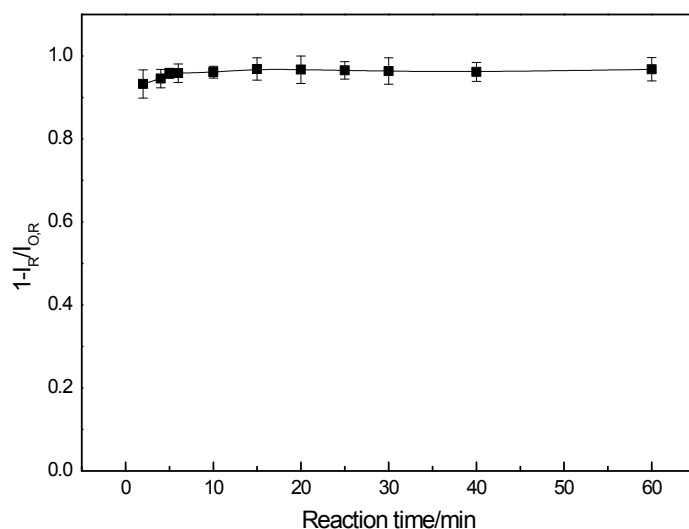

**Fig. S8** Effect of reaction time on CDs/Cu(II) system. Conditions: CDs concentration, 90  $\mu\text{g/mL}$ ; Cu(II) concentration: 2000  $\mu\text{g/L}$ ; pH 6.0; fluorescence intensity ratio of CDs:  $I_R=I_{420}/I_{352}$ ; and  $I_o$  and  $I$  are fluorescence intensity in the absence and presence of Cu(II), respectively.

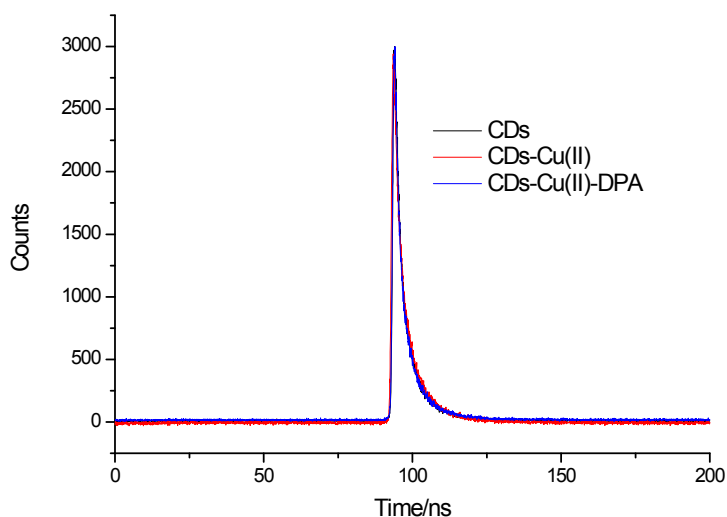

**Fig. S9** Fluorescence life-time decay plot for CDs, CDs-Cu(II) and CDs-Cu(II)-DPA.

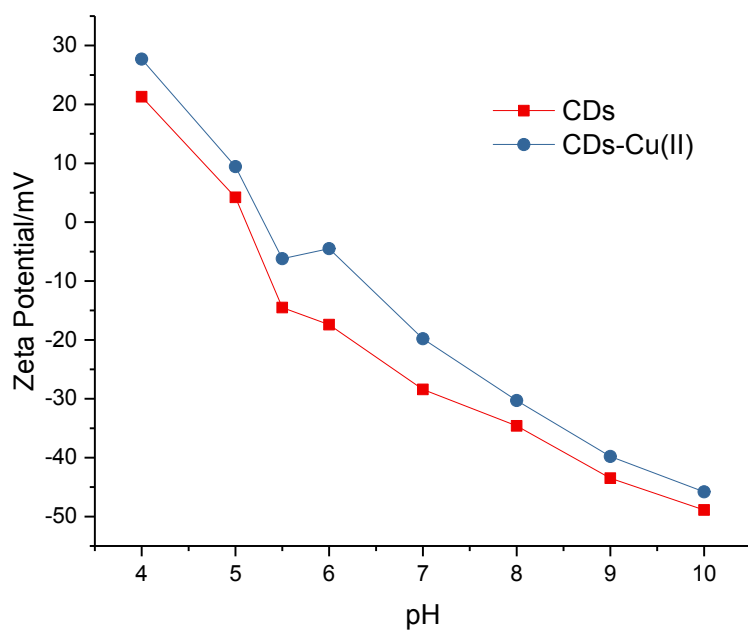

**Fig. S10** Zeta potential of CDs with and without 1000  $\mu\text{g/L}$  of  $\text{Cu(II)}$  at different pH.

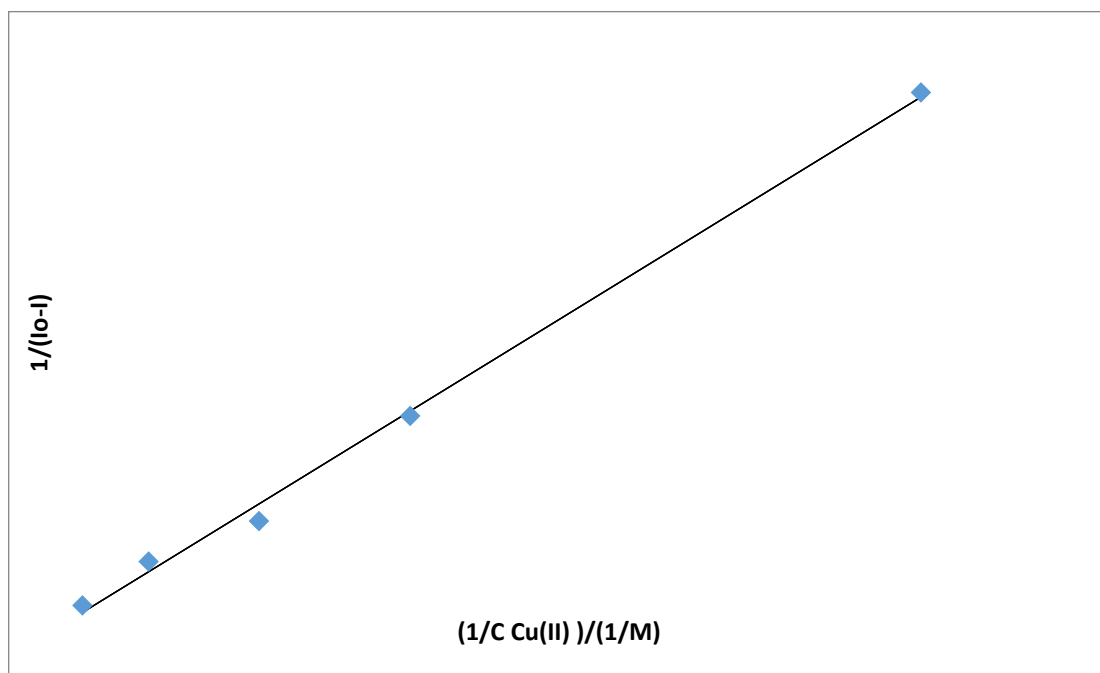

**Fig S11.** The relationship curve of  $1/(I_0 - I)$  and  $1/C_{\text{Cu(II)}}$  for CDs. ( $R = 0.9962$ )

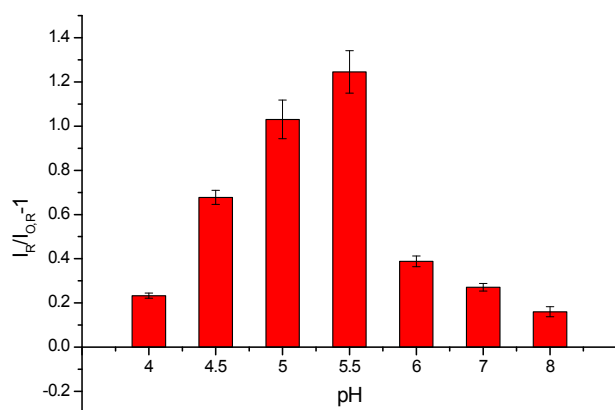

**Fig. S12.** pH effect on restoration of CDs-Cu(II) system with addition of DPA. Conditions: CDs concentration, 90  $\mu\text{g/mL}$ ; Cu(II) concentration: 2000  $\mu\text{g/L}$ ; DPA concentration, 10  $\mu\text{mol/L}$ ; incubation time: 2 min; fluorescence intensity ratio of CDs:  $I_R = I_{420}/I_{352}$ ; and  $I_0$  and  $I$  are fluorescence intensity in the absence and presence of DPA in CDs-Cu(II) sensor system, respectively.

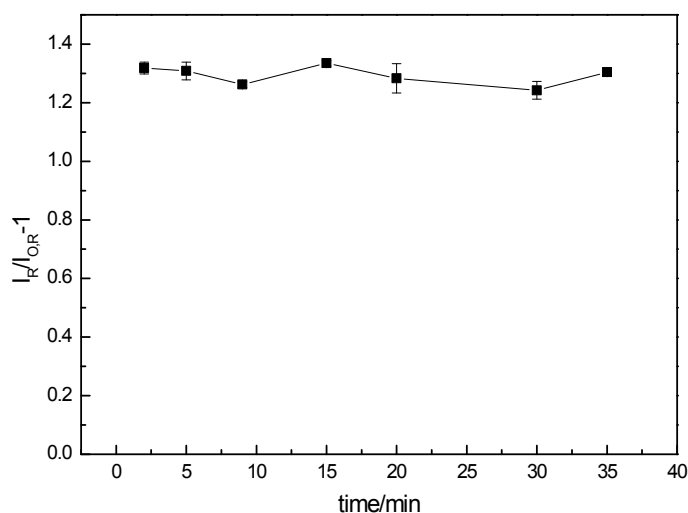

**Fig. S13.** Incubation time effect on the restoration of CDs-Cu(II) system with addition of DPA. Conditions: CDs concentration, 90  $\mu\text{g/mL}$ ; Cu(II) concentration: 2000  $\mu\text{g/L}$ ; DPA concentration, 10  $\mu\text{mol/L}$ ; pH 5.5; the fluorescence intensity ratio of CDs  $I_R = I_{420}/I_{352}$ ; and  $I_0$  and  $I$  are fluorescence intensity in the absence and presence of DPA in CDs-Cu(II) sensor system, respectively.

**Table S1. Quantum yield (QY) calculation of the CDs at 365 nm excitation.**

| Sample          | integrated fluorescence<br>intensity(F) | UV<br>Absorbance | Quantum yield<br>( $\Phi$ )/% |
|-----------------|-----------------------------------------|------------------|-------------------------------|
| Quinine sulfate | 65465432                                | 0.063            | 54                            |
| CDs-1(pH 3.0)   | 4918567                                 | 0.018            | 14.2                          |
| CDs-2(pH 5.0)   | 14734533                                | 0.031            | 24.7                          |
| CDs-3(pH 7.2)   | 3694698                                 | 0.015            | 12.8                          |
| CDs-3(pH 8.5)   | 2035933                                 | 0.023            | 4.6                           |

**Table S2 Performance evaluation of CDs for Cu(II) and DPA detection.**

|                 | Cu(II)                                   | DPA                                     |
|-----------------|------------------------------------------|-----------------------------------------|
| Linear Range    | 1-500 $\mu\text{g/L}$                    | 0.25-20 $\mu\text{mol/L}$               |
| Equation        | $y=(0.0846\pm0.0008)x+(6.8852\pm0.1987)$ | $y=(0.1589\pm0.0110)x+(1.1214\pm0.109)$ |
| R-square        | 0.9919                                   | 0.9971                                  |
| LOD             | 0.16 $\mu\text{g/L}$                     | 0.079 $\mu\text{mol/L}$                 |
| 3s(blank)/slope |                                          |                                         |
| RSD (n=11)      |                                          |                                         |
|                 | 2.75% <sup>a</sup>                       | 1.52% <sup>d</sup>                      |
|                 | 0.58% <sup>b</sup>                       | 2.22% <sup>e</sup>                      |
|                 | 0.62% <sup>c</sup>                       | 1.78% <sup>f</sup>                      |

Cu(II) concentration for RSDs: <sup>a</sup>, 20  $\mu\text{g/L}$ ; <sup>b</sup>, 100  $\mu\text{g/L}$ ; <sup>c</sup>, 500  $\mu\text{g/L}$ .

DPA concentration of RSDs: <sup>d</sup>, 1  $\mu\text{mol/L}$ ; <sup>e</sup>, 10  $\mu\text{mol/L}$ ; <sup>f</sup>, 20  $\mu\text{mol/L}$

**Table S3. Average lifetime fit by Origin software using ExpDecay2**

|           | R-square | $\alpha_1$ | $t_1$   | $\alpha_2$ | $t_2$   | $\tau/\text{ns}$ |
|-----------|----------|------------|---------|------------|---------|------------------|
| DA        | 0.99791  | 961.8555   | 6.65839 | 2397.678   | 1.90147 | 4.68             |
| DA-Cu     | 0.99866  | 1860.916   | 2.00249 | 887.8286   | 6.47747 | 4.72             |
| DA-Cu-DPA | 0.99787  | 2382.681   | 1.69077 | 1084.085   | 6.22592 | 4.53             |

**Table S4 Zeta potential, conductivity and average size of CDs, CDs-Cu(II), and CDs-Cu(II)-DPA at pH 5.5.**

|                | Zeta potential<br>/mV | Conductivity<br>/mS/cm | Average size measured by<br>DLS<br>/nm |
|----------------|-----------------------|------------------------|----------------------------------------|
| CDs            | -15.8                 | 6.9                    | 39.3                                   |
| CDs-Cu(II)     | -6.2                  | 10.1                   | 420.4                                  |
| CDs-Cu(II)-DPA | -8.89                 | 9.11                   | 109.5                                  |

**Table S5:** Concentration of Cu(II) and DPA in real water samples (n=3).

|                 | Cu(II) |              |          | DPA     |            |          |
|-----------------|--------|--------------|----------|---------|------------|----------|
|                 | Added  | Found        | Recovery | Added   | Found      | Recovery |
|                 | /μg/L  | / μg /L      | /%       | /μmol/L | /μmol/L    | /%       |
| Tap water       | 0      | 11.41±0.97   | -        | 0       | N.D.       | -        |
|                 | 40     | 49.12±2.37   | 94.3     | 2       | 1.87±0.07  | 93.4     |
|                 | 400    | 381.20±21.08 | 95.3     | 15      | 14.15±0.83 | 94.3     |
| Rain water      | 0      | 9.82±0.63    | -        | 0       | N.D.       | -        |
|                 | 40     | 49.20±1.98   | 98.5     | 2       | 1.83±0.06  | 91.3     |
|                 | 400    | 391.60±28.31 | 97.9     | 15      | 13.88±1.02 | 92.5     |
| Reservoir water | 0      | 23.10±1.21   | -        | 0       | N.D.       | -        |
|                 | 40     | 59.62±3.23   | 91.3     | 2       | 1.75±0.07  | 87.4     |
|                 | 400    | 357.60±19.32 | 89.4     | 15      | 13.59±0.85 | 90.6     |

Recovery = (amount found in spiked sample - amount found in original sample) × 100  
/ amount added.

N. D. : not detected

**Table S6. Determination of DPA in fetal bovine serum samples (n=3).**

| Added standard DPA | Founded DPA          | Recovery (%) |
|--------------------|----------------------|--------------|
| /μmol/L            | (10 <sup>-6</sup> M) |              |
| 0                  | N.D.                 | -            |
| 2                  | 1.83 ± 0.05          | 91.5         |
| 10                 | 9.24± 0.19           | 92.4         |
